# Supplementary material for: Characterization of a Soybean (Glycine max L. Merr.) Population for Germination and Seedling Root Traits under Water Stress
Source: MDPI journal article supplement (doi:10.3390/agronomy12081944), 2022-08-18
Supplement: s1 [file s1]

Archive with 2 entries (2 files):
- Supplementary Figures.pdf
- Supplementary Tables.xlsx
