# Supplementary material for: Characterization of a Soybean (Glycine max L. Merr.) Population for Germination and Seedling Root Traits under Water Stress
Source: MDPI journal article supplement (doi:10.3390/agronomy12081944), 2022-08-18
Supplement: s1 [file s1 › Supplementary Tables.xlsx]

## Sheet: S1_List of genotypes
Table S1. List of soybean genotypes used in the study, country of origin, and 200-seed weight
Sl. No	Genotype ID	Country of origin	200-seed weight (g)
1	PI 360836	Japan	48
2	PI 360848	Japan	44
3	PI 398181	South Korea	56
4	PI 398200	South Korea	69
5	PI 398201	South Korea	69
6	PI 398202	South Korea	44
7	PI 398237	South Korea	71
8	PI 398242	South Korea	44
9	PI 398319	South Korea	77
10	PI 398398	South Korea	48
11	PI 398492	South Korea	44
12	PI 398532	South Korea	71
13	PI 398566	South Korea	46
14	PI 398704	South Korea	18
15	PI 398872	South Korea	63
16	PI 398965	South Korea	29
17	PI 398987	South Korea	37
18	PI 399094	South Korea	65
19	PI 404191	Russia	33
20	PI 407848	South Korea	16
21	PI 408033	South Korea	60
22	PI 408169D	South Korea	18
23	PI 408175	South Korea	44
24	PI 408194	South Korea	44
25	PI 424219A	South Korea	35
26	PI 424305	South Korea	39
27	PI 424329	South Korea	42
28	PI 424419	South Korea	48
29	PI 424479	South Korea	21
30	PI 424605A	South Korea	56
31	PI 442012B	South Korea	44
32	PI 507265	Japan	50
33	PI 507382	Japan	54
34	PI 507441A	Japan	60
35	PI 508293	South Korea	29
36	PI 509079	South Korea	33
37	PI 532437	China	58
38	PI 538389	Japan	16
39	PI 603171	North Korea	29
40	PI 603407	China	39
41	PI 603543B	China	25

## Sheet: S2_Results of soil analysis
Table S2. Results of soil analysis conducted before soybean planting. Soil from the Florence (SC) experimental fields was analyzed at the Clemson University Agricultural Service Laboratory, Clemson, SC. Soil from the Jackson Springs (NC) experimental field was analyzed at the North Carolina Department of Agriculture and Consumer Services (NCDA&CS) Agronomic Services Division, Raleigh, NC.
Soil Parameter/Nutrients	Florence, SC (2021)	Florence, SC (2022)		Soil Parameter/Nutrients	Jackson Springs, NC (2022)	Remarks
Soil pH	6.33	5.45		Soil pH	6.2
Phosphorus (Kg ha-1)	93.03 (Sufficient1)	158.32 (High)		Phosphorus index	100	0–10, very low; 11–25, low; 26–50, medium; 51–100, high; and 100+ , very high
Potassium (Kg ha-1)	139.55 (Medium)	109.84 (Medium)		Potassium index	21
Calcium (Kg ha-1)	806.73 (Medium)	524.84 (Medium)		% of CEC3 occupied by calcium	63	Not deficient
Magnesium (Kg ha-1)	162.52 (Sufficient)	31.66 (Low)		% of CEC occupied by magnesium	21	Application is not necessary if the value is >10
Zinc (Kg ha-1)	7.15 (Medium)	14.18 (Medium)		Zinc availability index	312	Sufficient if the value is above 25
Manganese (Kg ha-1)	14.85 (Medium)	19.9 (Medium)		Manganese availability index	37
Boron (Kg ha-1)	0.34 (Medium)	0.28 (Medium)		Boron	NA
Sulfur	NA2			Sulfur index	22	Sufficient if the value is above 25
Copper (Kg ha-1)	3.67	1.04		Copper index	83
Sodium (Kg ha-1)	34.19	3.92		Sodium (meq/100 cm3)	0.1	Values < 0.4 meq/100 cm3 are inconsequential
1The remarks: sufficient, medium, high, or low indicate soil nutrient status provided in the soil analysis results.
2Not available
3Cation Exchange Capacity

## Sheet: S3_Germination and emergence
Table S3. Germination traits of soybean genotypes under controlled environmental conditions and emergence percentage under field conditions
Sl. No	Genotype ID	Germination percentage at different water potentials					Germination potential (%) at different water potentials					Germination rate index (% day-1) at different water potentials							Genotype	Genotype ID	Emergence percentage
		0.00 Mpa	-0.27 Mpa	-0.54 Mpa	-0.82 Mpa	-1.09 Mpa	0.00 Mpa	-0.27 Mpa	-0.54 Mpa	-0.82 Mpa	-1.09 Mpa	0.00 Mpa	-0.27 Mpa	-0.54 Mpa	-0.82 Mpa	-1.09 Mpa					Florence, 2021	Florence, 2022	Jackson Springs, 2022
1	PI 360836	98.33	100	98.3333	95	16.6667	91.6667	100	71.6667	33.3333	-2.9e-15	31.6985	33.335	28.7465	23.1585	2.4765			1	PI 360836	23.0625	43.25	60.6875
2	PI 360848	88.33	86.6667	98.3333	88.3333	18.3333	78.3333	73.3333	81.6667	16.6667	-3.55e-15	27.92	27.1115	30.46	19.0335	3.1915			2	PI 360848	23.125	25.75	58.1875
3	PI 398181	93.33	90	73.3333	23.3333	1.6667	91.6667	90	58.3333	5	-3.03e-15	30.8885	30.0015	22.1585	5.3335	0.33335			3	PI 398181	15.9375	21.625	52.375
4	PI 398200	100	98.3333	98.3333	81.6667	3.3333	98.3333	98.3333	98.3333	53.3333	-4.07e-15	33.1115	32.7785	32.7785	23.0635	0.6665			4	PI 398200	36.5625	24.375	49.4375
5	PI 398201	91.67	85	75	33.3333	-1.56e-13	90	80	58.3333	13.3333	-3.55e-15	30.3335	27.6665	22.5865	8.16	-2.22e-14			5	PI 398201	12.5	28.6875	55.125
6	PI 398202	91.67	96.6667	83.3333	90	8.3333	68.3333	75	70	11.6667	-4.07e-15	26.6815	29.2385	25.905	18.8885	1.3815			6	PI 398202	20.4375	40.9375	50.625
7	PI 398237	88.33	71.6667	45	25	-1.56e-13	75	56.6667	28.3333	8.3333	-4.07e-15	27.6665	21.8885	12.7785	6.11	-2.055e-14			7	PI 398237	4.9375	3.75	22.9375
8	PI 398242	96.67	91.6667	85	33.3333	11.6667	91.6667	88.3333	65	5	-3.81e-15	31.5565	30.1115	25.6665	7.0485	2.2385			8	PI 398242	23.5	38.4375	61.6875
9	PI 398319	95	96.6667	95	96.6667	15	86.6667	81.6667	70	38.3333	-4.2e-15	30.365	30.1265	28.2365	24.0635	2.62			9	PI 398319	19.875	49.25	49.4375
10	PI 398398	100	95	98.3333	90	21.6667	86.6667	86.6667	80	21.6667	-4.07e-15	31.365	30.46	30.2385	20.5065	3.5715			10	PI 398398	7.5625	23.875	63.8125
11	PI 398492	96.67	95	88.3333	60	3.3333	96.6667	91.6667	68.3333	33.3333	-4.07e-15	32.2215	31.2215	26.6835	16.35	0.6665			11	PI 398492	33.625	44.5	63.1875
12	PI 398532	95	95	95	91.6667	63.3333	81.6667	86.6667	80	70	5	29.6985	30.555	29.665	27.38	11.81			12	PI 398532	35	48.8125	53.6875
13	PI 398566	100	100	98.3333	100	93.3333	93.3333	100	95	81.6667	18.3333	32.445	33.335	32.335	30.89	20.445			13	PI 398566	35	49.75	65.5625
14	PI 398704	86.67	81.6667	76.6667	33.3333	3.3333	86.6667	75	58.3333	6.6667	1.6667	28.89	26.3335	22.92	7.46	0.8885			14	PI 398704	12.8125	44.4375	53.125
15	PI 398872	100	100	95	90	25	93.3333	96.6667	30	21.6667	-3.68e-15	32.4435	32.8885	22.715	19.4585	4.43			15	PI 398872	12.75	44.4375	49.875
16	PI 398965	100	81.6667	78.3333	56.6667	13.3333	100	80	63.3333	33.3333	-3.81e-15	33.335	27	24.015	15.7785	2.6665			16	PI 398965	8.9375	54.125	51.6875
17	PI 398987	96.67	90	65	15	10	95	86.6667	55	6.6667	1.6667	32	29.555	20.3335	3.8885	2.2215			17	PI 398987	39.4375	50.625	46.875
18	PI 399094	91.67	96.6667	96.6667	93.3333	21.6667	86.6667	93.3333	48.3333	16.6667	-3.29e-15	29.89	31.7765	25.3965	19.65	3.7635			18	PI 399094	11.9375	35	65.6875
19	PI 404191	98.33	85	46.6667	18.3333	3.3333	95	83.3333	40	3.3333	-3.55e-15	32.3315	28.1115	14.6665	3.92	0.47665			19	PI 404191	12.5	27.875	62.8125
20	PI 407848	95	93.3333	73.3333	16.6667	-9.59e-14	91.6667	93.3333	51.6667	1.6667	-3.29e-15	31.1265	31.11	21.46	3.555	-1.22e-14			20	PI 407848	26.4375	42.9375	62.125
21	PI 408033	91.67	100	96.6667	81.6667	11.6667	78.3333	81.6667	40	10	-3.55e-15	28.7785	30.7	24.38	16.3335	2.0485			21	PI 408033	7	28.125	47.25
22	PI 408169D	86.67	68.3333	53.3333	15	-8.88e-14	83.3333	68.3333	40	-1.08e-13	-3.55e-15	28.445	22.7765	15.905	2.715	-1.165e-14			22	PI 408169D	26.5	35.1875	46.75
23	PI 408175	88.33	68.3333	56.6667	16.6667	3.3333	88.3333	68.3333	46.6667	6.6667	-3.55e-15	29.4435	22.7785	17.5565	4.2235	0.5715			23	PI 408175	11	42.0625	60.375
24	PI 408194	100	98.3333	95	91.6667	15	98.3333	91.6667	43.3333	13.3333	-3.81e-15	33.1115	31.89	24.6815	18.6835	2.525			24	PI 408194	24.5625	65.1875	63.75
25	PI 424219A	96.67	88.3333	86.6667	20	5	96.6667	80	65	3.3333	-4.07e-15	32.2215	28.335	26	4.255	0.81			25	PI 424219A	21.1875	23.75	45.8125
26	PI 424305	98.33	90	71.6667	33.3333	11.6667	98.3333	85	46.6667	8.3333	1.6667	32.7785	29.3335	20.27	7.3985	2.27			26	PI 424305	16	57.25	76.5625
27	PI 424329	98.33	91.6667	90	88.3333	18.3333	85	75	36.6667	3.3333	-3.42e-15	30.81	28.3335	22.7935	15.825	3.0965			27	PI 424329	13.3125	39.8125	59.4375
28	PI 424419	98.33	96.6667	91.6667	88.3333	20	96.6667	70	55	15	-3.81e-15	32.4615	28.38	25.6665	18.1435	3.335			28	PI 424419	27.5625	42.3125	56.3125
29	PI 424479	98.33	98.3333	95	93.3333	13.3333	93.3333	80	55	5	-3.81e-15	32.11	30.2385	26.2385	18.0965	2.19			29	PI 424479	12.6875	32.4375	60.375
30	PI 424605A	100	100	98.3333	96.6667	63.3333	100	100	96.6667	58.3333	6.6667	33.335	33.335	32.555	26.9215	12.9835			30	PI 424605A	38.9375	59.4375	58.3125
31	PI 442012B	98.33	98.3333	96.6667	98.3333	45	90	91.6667	85	30	1.6667	31.5715	31.8885	30.57	23.4765	7.7			31	PI 442012B	12.0625	28.125	58.25
32	PI 507265	98.33	95	83.3333	45	11.6667	98.3333	91.6667	51.6667	8.3333	5	32.7785	31.2235	23.175	9.635	3			32	PI 507265	16	23.3125	53.9375
33	PI 507382	96.67	96.6667	85	50	-4.26e-14	95	90	70	8.3333	-3.94e-15	32	31.3335	26.3335	10.73	-4.44e-15			33	PI 507382	15.625	32.1875	32.375
34	PI 507441A	98.33	95	68.3333	36.6667	1.6667	95	88.3333	40	6.6667	-4.2e-15	32.335	30.7785	18.81	7.935	0.23835			34	PI 507441A	14.4375	29.5	43.5
35	PI 508293	96.67	95	80	76.6667	5	95	90	73.3333	33.3333	-4.2e-15	32.0015	31	25.6835	19.4915	1			35	PI 508293	28.5	43	59.5625
36	PI 509079	98.33	95	93.3333	55	11.6667	95	93.3333	83.3333	10	1.6667	32.3335	31.445	29.7785	11.9535	2.365			36	PI 509079	20.6875	32.25	58.875
37	PI 532437	93.33	90	86.6667	86.6667	18.3333	78.3333	65	33.3333	13.3333	-4.07e-15	29.0165	26.5715	21.4915	18.1585	3.1915			37	PI 532437	20.4375	42.9375	49.375
38	PI 538389	100	96.6667	83.3333	51.6667	6.6667	98.3333	95	70	13.3333	-4.07e-15	33.1115	32	26	11.8265	1.2385			38	PI 538389	9.375	35.1875	51.1875
39	PI 603171	95	85	40	35	5	88.3333	75	21.6667	6.6667	1.6667	30.7785	27	10.7935	7.4135	1.1265			39	PI 603171	3.625	2.1875	22.625
40	PI 603407	98.33	96.6667	90	50	13.3333	96.6667	93.3333	71.6667	13.3333	1.6667	32.555	31.7785	27.555	11.205	2.7935			40	PI 603407	31.5	53.4375	65.4375
41	PI 603543B	96.67	98.3333	93.3333	93.3333	30	88.3333	85	73.3333	15	-1.28e-13	31.0165	31	28.1585	20.095	4.7615			41	PI 603543B	17.5	47.5625	52.375
Lowest Score		86.67	68.33	40	15	0	68.33	56.67	21.67	0	0	26.68	21.88	10.94	2.71	0			Lowest Score		3.63	2.19	22.63
Highest Score		100	100	98.33	100	93.33	100	100	98.33	81.67	18.33	33.33	33.33	32.78	30.89	20.44			Highest Score		39.44	65.19	76.56
Mean		95.8534	91.9922	82.8856	61.8293	15.6907	90.6	84.75	60.24	18.61	1.14	31.19	29.67	24.49	14.34	2.95			Mean		19.6215	37.5	54.18

## Sheet: S4_Ranking for root traits
	Table S4. Ranking of soybean genotypes for root traits under severe and extreme water stress. Genotypes were ranked based on the numerical values of root traits. Values in parentheses are LS means ± standard errors of the respective traits. Values followed by different letters are significantly different according to a LSD test at α=0.05.
		Total root traits			Traits of fine roots with diameter <0.25 mm			Traits of fine roots with diameter between 0.25 and 0.5 mm
	Highest 15 genotypes under severe water stress (-0.82 MPa)	Length (cm)	Surface area (cm2)	Volume (cm3)	Length (cm)	Surface area (cm2)	Volume (cm3)	Length (cm)	Surface area (cm2)	Volume (cm3)
		PI 424479 (68.25±17.28) a	PI 398872 (12.52±2.8) a	PI 398872 (0.2982±0.06) a	PI 398872 (25.3±7.03) a	PI 398872 (1±0.28) a	PI 603543B (0.00355±0.001) a	PI 424329 (28.54±7.42) a	PI 424329 (3.3±0.82) a	PI 424329 (0.03175±0.008) a
		PI 603543B (65.54±17.28) a	PI 424479 (11.5±3.12) ab	PI 532437 (0.1626±0.06) ab	PI 603543B (24.52±7.82) ab	PI 603543B (0.99±0.31) ab	PI 398872 (0.00352±0.001) a	PI 603543B (25.41±7.42) ab	PI 603543B (2.97±0.82) ab	PI 603543B (0.0289±0.008) ab
		PI 424329 (60.1±17.28) ab	PI 532437 (10.02±3.12) abc	PI 424479 (0.1594±0.06) ab	PI 424479 (23.94±7.82) abc	PI 424479 (0.97±0.31) abc	PI 424479 (0.003487±0.001) a	PI 398202 (25.32±7.42) ab	PI 398398 (2.81±0.82) ab	PI 398398 (0.02823±0.008) ab
		PI 532437 (59.04±17.28) ab	PI 603543B (9.72±3.12) abc	PI 603543B (0.127±0.06) b	PI 398202 (21.23±7.82) abc	PI 398202 (0.87±0.31) abc	PI 398202 (0.003225±0.001) a	PI 532437 (24.12±7.42) ab	PI 532437 (2.78±0.82) ab	PI 532437 (0.02671±0.008) abc
		PI 424419 (56.52±17.28) ab	PI 424329 (9.44±3.12) abc	PI 424419 (0.1232±0.06) b	PI 398319 (21.07±7.82) abc	PI 398319 (0.84±0.31) abc	PI 398319 (0.003013±0.001) a	PI 398319 (23.82±7.42) ab	PI 398202 (2.7±0.82) ab	PI 424419 (0.02585±0.008) abc
		PI 398319 (55.37±17.28) ab	PI 424419 (9.2±3.12) abc	PI 424329 (0.1224±0.06) b	PI 532437 (20.2±7.82) abc	PI 532437 (0.79±0.31) abc	PI 532437 (0.0028±0.001) a	PI 424605A (23.13±7.42) ab	PI 398319 (2.68±0.82) ab	PI 424479 (0.02571±0.008) abc
		PI 398202 (52.07±17.28) ab	PI 398398 (8.63±3.12) abc	PI 398398 (0.1203±0.06) b	PI 424419 (19.51±7.82) abc	PI 424419 (0.76±0.31) abc	PI 424605A (0.002787±0.001) a	PI 398398 (23.09±7.42) ab	PI 424479 (2.64±0.82) ab	PI 398319 (0.02521±0.008) abc
		PI 398398 (52.02±17.28) ab	PI 398319 (7.19±3.12) abc	PI 442012B (0.0924±0.06) b	PI 424605A (18.15±7.82) abc	PI 424605A (0.75±0.31) abc	PI 424419 (0.00265±0.001) a	PI 424479 (22.61±7.42) ab	PI 424605A (2.62±0.82) ab	PI 424605A (0.02479±0.008) abc
		PI 424605A (51.74±17.28) ab	PI 442012B (7.08±3.12) abc	PI 424605A (0.0789±0.06) b	PI 424329 (17.36±7.82) abc	PI 424329 (0.71±0.31) abc	PI 424329 (0.002612±0.001) a	PI 442012B (22.1±7.42) ab	PI 424419 (2.6±0.82) ab	PI 442012B (0.02425±0.008) abc
		PI 442012B (45.4±17.28) ab	PI 424605A (7.02±3.12) abc	PI 398319 (0.0759±0.06) b	PI 398398 (16.49±7.82) abc	PI 398398 (0.65±0.31) abc	PI 398398 (0.002275±0.001) a	PI 424419 (21.81±7.42) ab	PI 442012B (2.54±0.82) ab	PI 398202 (0.02388±0.008) abc
		PI 398872 (41.43±15.54) ab	PI 398202 (5.89±3.12) abc	PI 398202 (0.0568±0.06) b	PI 442012B (12.04±7.82) abc	PI 360836 (0.52±0.31) abc	PI 360836 (0.001988±0.001) a	PI 360836 (18.12±7.42) ab	PI 360836 (1.91±0.82) ab	PI 360836 (0.01684±0.008) abc
		PI 360836 (34.65±17.28) ab	PI 398566 (4.84±3.6) abc	PI 398566 (0.0568±0.07) b	PI 360836 (11.91±7.82) abc	PI 442012B (0.51±0.31) abc	PI 442012B (0.001912±0.001) a	PI 398566 (16.31±8.53) ab	PI 398566 (1.74±0.94) ab	PI 398566 (0.01555±0.008) abc
		PI 398566 (33.68±19.9) ab	PI 360836 (4.21±3.12) bc	PI 360848 (0.0415±0.06) b	PI 398566 (9.85±9.01) abc	PI 398566 (0.44±0.36) abc	PI 398566 (0.001731±0.001) a	PI 360848 (10.57±7.42)ab	PI 360848 (1.21±0.82) ab	PI 360848 (0.01169±0.008) abc
		PI 360848 (23.49±17.28) ab	PI 360848 (3.49±3.12) bc	PI 360836 (0.0414±0.06) b	PI 360848 (7.2±7.82) abc	PI 360848 (0.31±0.31) abc	PI 360848 (0.001175±0.001) a	PI 398872 (8.9±6.69) b	PI 398872 (0.91±0.74) b	PI 509079 (0.008291±0.008) bc
		PI 509079 (14.35±17.28) b	PI 509079 (2.46±3.12) c	PI 509079 (0.0315±0.06) b	PI 509079 (3.17±7.82) bc	PI 509079 (0.12±0.31) bc	PI 509079 (0.000435±0.001) a	PI 509079 (6.04±7.42) b	PI 509079 (0.78±0.82) b	PI 398872 (0.007833±0.007) c
	Highest 15 genotypes under extreme water stress (-1.09 MPa)	PI 424479 (15.35±2.34) a	PI 424479 (2.17±0.39) a	PI 424479 (0.0248±0.005) a	PI 424479 (5.88±0.81) a	PI 424479 (0.23±0.03) a	PI 424479 (0.000775±0.0001)a	PI 424605A (5.87±0.92) a	PI 424605A (0.66±0.1) a	PI 424479 (0.006275±0.0009) a
		PI 424605A (11.94±2.34) a	PI 424605A (1.83±0.39) a	PI 424419 (0.0231±0.005) ab	PI 424605A (2.98±0.81) b	PI 424605A (0.13±0.03) b	PI 424605A (0.000513±0.0001) ab	PI 424479 (5.7±0.92) a	PI 424479 (0.65±0.1) a	PI 424605A (0.006145±0.0009) a
		PI 424419 (5.84±2.34) b	PI 424419 (1.29±0.39) ab	PI 424605A (0.0227±0.005) abc	PI 603543B (1.62±0.81) bc	PI 603543B (0.07±0.03) bc	PI 603543B (0.000275±0.0001) bc	PI 603543B (2.12±0.92) b	PI 398872 (0.25±0.1) b	PI 398872 (0.002325±0.0009) b
		PI 603543B (4.58±2.34) b	PI 398872 (0.77±0.39) b	PI 407848 (0.012±0.005) abc	PI 360836 (1.5±0.81) bc	PI 360836 (0.06±0.03) bc	PI 360836 (0.000213±0.0001) bc	PI 398872 (2.12±0.92) b	PI 603543B (0.23±0.1) b	PI 603543B (0.002075±0.0009) b
		PI 398872 (4.08±2.34) b	PI 398319 (0.73±0.39) b	PI 442012B (0.0119±0.005) abc	PI 424419 (1.34±0.81) bc	PI 424419 (0.052±0.03) bc	PI 424419 (0.000187±0.0001) c	PI 360836 (1.77±0.92) b	PI 398319 (0.19±0.1) b	PI 398319 (0.001813±0.0009) b
		PI 398319 (4.04±2.34) b	PI 603543B (0.64±0.39) b	PI 398872 (0.0115±0.005) abc	PI 398319 (1.19±0.81) bc	PI 398319 (0.049±0.03) bc	PI 398319 (0.000175±0.0001) c	PI 398319 (1.67±0.92) b	PI 360836 (0.18±0.1) b	PI 424419 (0.001812±0.0009) b
		PI 360836 (4.03±2.34) b	PI 407848 (0.64±0.39) b	PI 398319 (0.0106±0.005) abc	PI 408194 (1.16±0.81) bc	PI 408194 (0.046±0.03) c	PI 408194 (0.000175±0.0001) c	PI 424419 (1.54±0.92) b	PI 424419 (0.18±0.1) b	PI 360836 (0.001525±0.0009) b
		PI 408194 (3.26±2.34) b	PI 532437 (0.59±0.39) b	PI 532437 (0.0103±0.005) abc	PI 398532 (1.12±0.81) bc	PI 398532 (0.045±0.03) c	PI 398532 (0.000163±0.0001) c	PI 408194 (1.2±0.92) b	PI 407848 (0.14±0.1) b	PI 407848 (0.001475±0.0009) b
		PI 398532 (3.12±2.34) b	PI 360836 (0.54±0.39) b	PI 398965 (0.0088±0.005) bc	PI 398566 (0.74±0.81) c	PI 398566 (0.03±0.03) c	PI 398566 (0.000125±0.0001) c	PI 398532 (1.15±0.92) b	PI 408194 (0.13±0.1) b	PI 408194 (0.001162±0.0009) b
		PI 532437 (2.76±2.34) b	PI 408194 (0.54±0.39) b	PI 603543B (0.0073±0.005) c	PI 532437 (0.72±0.81) c	PI 532437 (0.03±0.03) c	PI 398202 (0.000125±0.0001) c	PI 407848 (1.06±0.92) b	PI 398532 (0.12±0.1) b	PI 398532 (0.0011±0.0009) b
		PI 407848 (2.74±2.34) b	PI 442012B (0.51±0.39) b	PI 408194 (0.0073±0.005) c	PI 398202 (0.7±0.81) c	PI 398202 (0.03±0.03) c	PI 398872 (0.0001±0.0001) c	PI 398566 (0.83±0.92) b	PI 398566 (0.09±0.1) b	PI 532437 (0.000925±0.0009) b
		PI 398398 (2.27±2.34) b	PI 398532 (0.49±0.39) b	PI 398398 (0.0073±0.005) c	PI 398872 (0.64±0.81) c	PI 398872 (0.03±0.03) c	PI 442012B (0.000078±0.0001) c	PI 532437 (0.74±0.92) b	PI 532437 (0.09±0.1) b	PI 398566 (0.0009±0.0009) b
		PI 398566 (2.24±2.34) b	PI 398398 (0.45±0.39) b	PI 398532 (0.0066±0.005) c	PI 398398 (0.55±0.81) c	PI 398398 (0.02±0.03) c	PI 532437 (0.000075±0.0001) c	PI 442012B (0.61±0.92) b	PI 398398 (0.07±0.1) b	PI 398398 (0.0007±0.0009) b
		PI 442012B (1.94±2.34) b	PI 398566 (0.41±0.39) b	PI 424329 (0.0066±0.005) c	PI 442012B (0.42±0.81) c	PI 442012B (0.02±0.03) c	PI 398398 (0.000075±0.0001) c	PI 398398 (0.6±0.92) b	PI 442012B (0.06±0.1) b	PI 424329 (0.00055±0.0009) b
		PI 398202 (1.31±2.34) b	PI 424329 (0.3±0.39) b	PI 408033 (0.0063±0.005) c	PI 360848 (0.18±0.81) c	PI 360848 (0.01±0.03) c	PI 360848 (0.000025±0.0001) c	PI 424329 (0.37±0.92) b	PI 424329 (0.05±0.1) b	PI 442012B (0.000537±0.001) b

## Sheet: S5_Corrleation for root traits
Table S5. Correlation between root traits measured at multiple times [14 and 74 days after planting (DAP) in 2021 and 7 and 14 DAP in 2022] during soybean growth at Florence, SC
Root traits	Pearson correlation coefficient (r)
	14 and 74 DAP in 2021	7 and 14 DAP in 2022
Total root length	0.39	0.38
Total root surface area	0.49	0.44
Total root volume	0.48	0.42
Fine root1 length	0.37	0.45
Fine root surface area	0.4	0.48
Fine root volume	0.42	0.51
1diameter between 0.25 and 0.5 mm
